# Supplementary material for: NOD1 deficiency impairs CD44a/Lck as well as PI3K/Akt pathway
Source: PubMed Central journal article supplement (PMC5462776; doi:10.1038/s41598-017-03258-y), 2017-06-07
Supplement: 41598_2017_3258_MOESM1_ESM.pdf [file 41598_2017_3258_MOESM1_ESM.pdf]

NOD1 deficiency impairs CD44a/Lck as well as PI3K/Akt pathway

Yi Wei Hu, Xiao Man Wu, Shi Si Ren, Lu Cao, Pin Nie, Ming Xian Chang\*

**Figure S1**

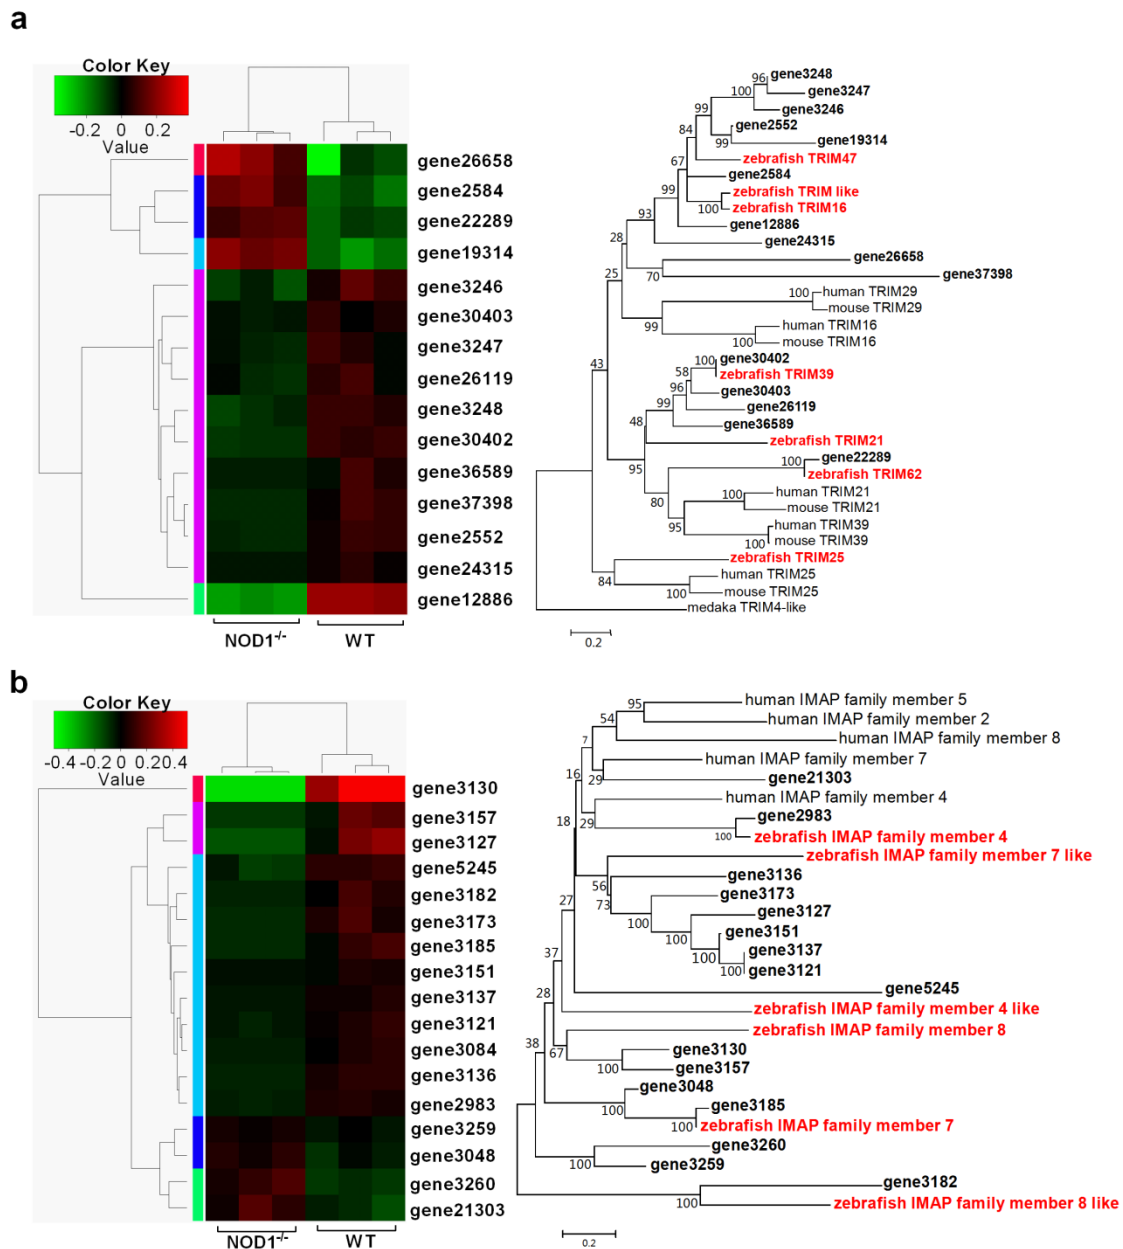

**Fig. S1. Heatmap and phylogenetic analysis for differentially expressed genes involved in immune system. (a)** Heatmap and phylogenetic analysis for tripartite motif proteins (TRIMs). Accession numbers of other TRIMs from NCBI database are as follows: human TRIM25, NP\_005073; mouse TRIM25, NP\_033572; zebrafish TRIM25, NP\_956469; zebrafish TRIM62, NP\_001074143; zebrafish TRIM47, XP\_002660960; human TRIM29, NP\_036233; mouse TRIM29, NP\_076144; human TRIM21, NP\_003132; mouse TRIM21, NP\_001076021; zebrafish TRIM21, XP\_691507; human TRIM39, NP\_067076; mouse TRIM39, NP\_840065; zebrafish TRIM39, XP\_009292249; human TRIM16, NP\_006461; mouse TRIM16, NP\_444399; zebrafish TRIM16, XP\_009297237; medaka TRIM4-like, XP\_011472583. **(b)** Heatmap and phylogenetic analysis for immunity-associated proteins (IMAPs). Accession numbers of other IMAPs from NCBI database are as follows: zebrafish IMAP family member 8 like, XP\_002664923; zebrafish IMAP family member 8, XP\_009294065; human IMAP family member 8, NP\_783161; zebrafish IMAP family member 7, XP\_009305485; zebrafish IMAP family member 7 like, XP\_009301153; human IMAP family member 7, NP\_694968; human IMAP family member 5, NP\_060854; zebrafish IMAP family member 4 like, XP\_001920359; zebrafish IMAP family member 4, XP\_009297228; human IMAP family member 4, NP\_060796; human IMAP family member 2, NP\_056475.

**Figure S2**

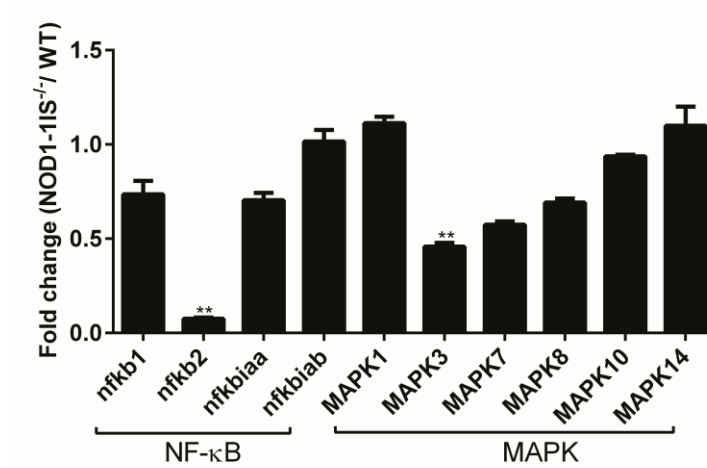

**Fig. S2. The effect of NOD1 deficiency on the expression of those genes involved in NF-κB and MAPK pathways.** 30~50 larvae from WT and *NOD1-1IS<sup>-/-</sup>* zebrafish were collected at 10 dpf, and used for qRT-PCR. Data represent the mean  $\pm$  the SEM, and were tested for statistical significance using two-tailed Student's t-test. \*\* $p < 0.01$ .

**Figure S3**

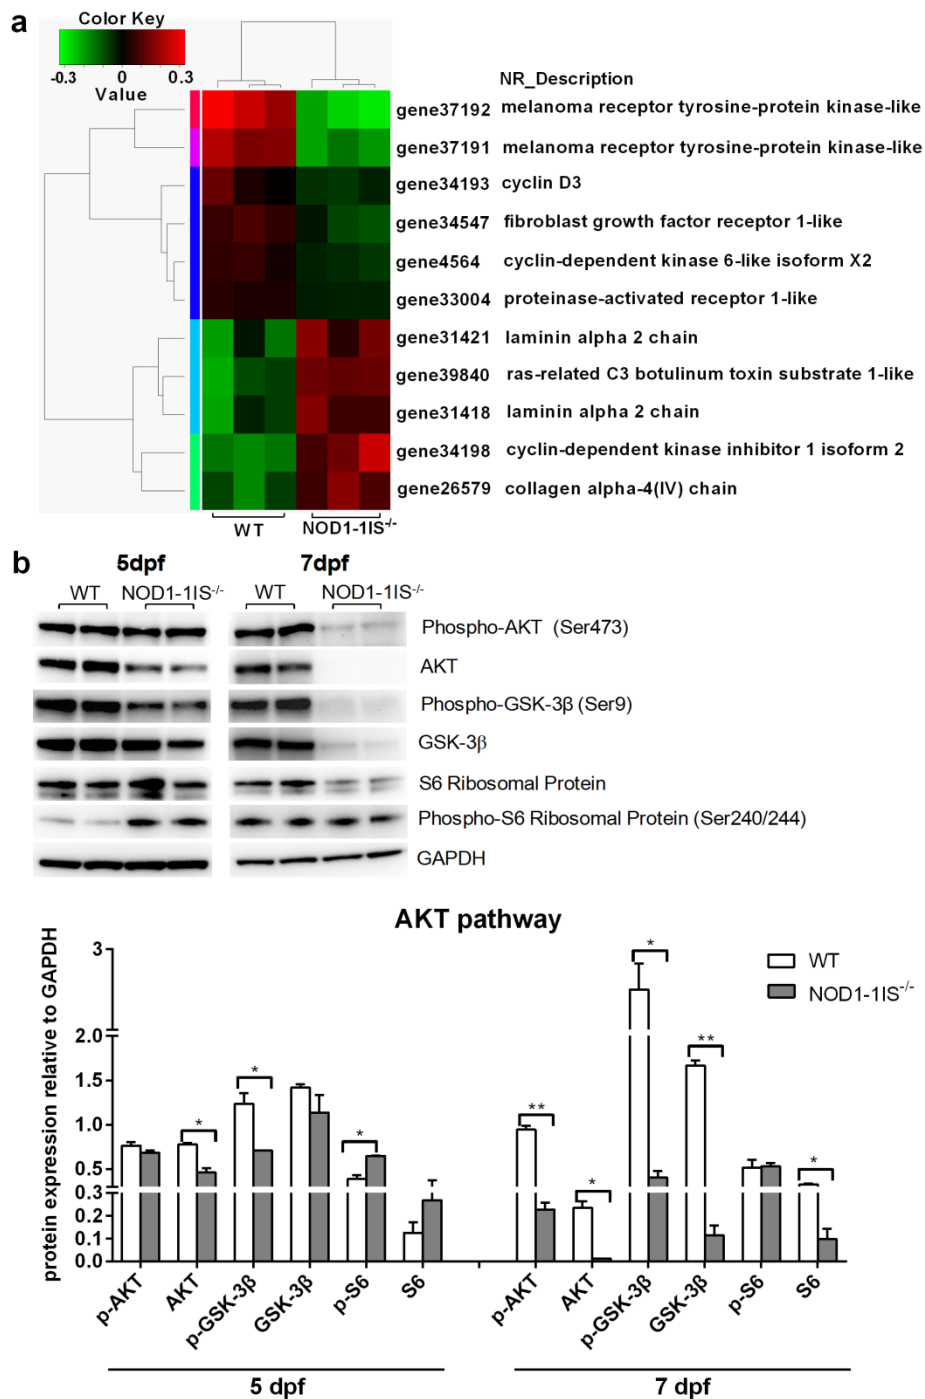

**Fig. S3. PI3K-Akt pathway is impaired in NOD1-deficient zebrafish.** (a) Heatmap analysis for differentially expressed genes involved in PI3K/Akt signaling pathway from transcriptomic data. (b) Immunoblot analysis of phospho-Akt, Akt, phospho-GSK3β, GSK3β, phospho-S6 and S6 in larvae homogenate from WT and *NOD1-1IS<sup>-/-</sup>* zebrafish at 5 and 7 dpf. Western blotting results were quantified using Quantity One software. Data represent the average of two independent experiments. \* $p < 0.05$ , \*\* $p < 0.01$ .

Figure S4

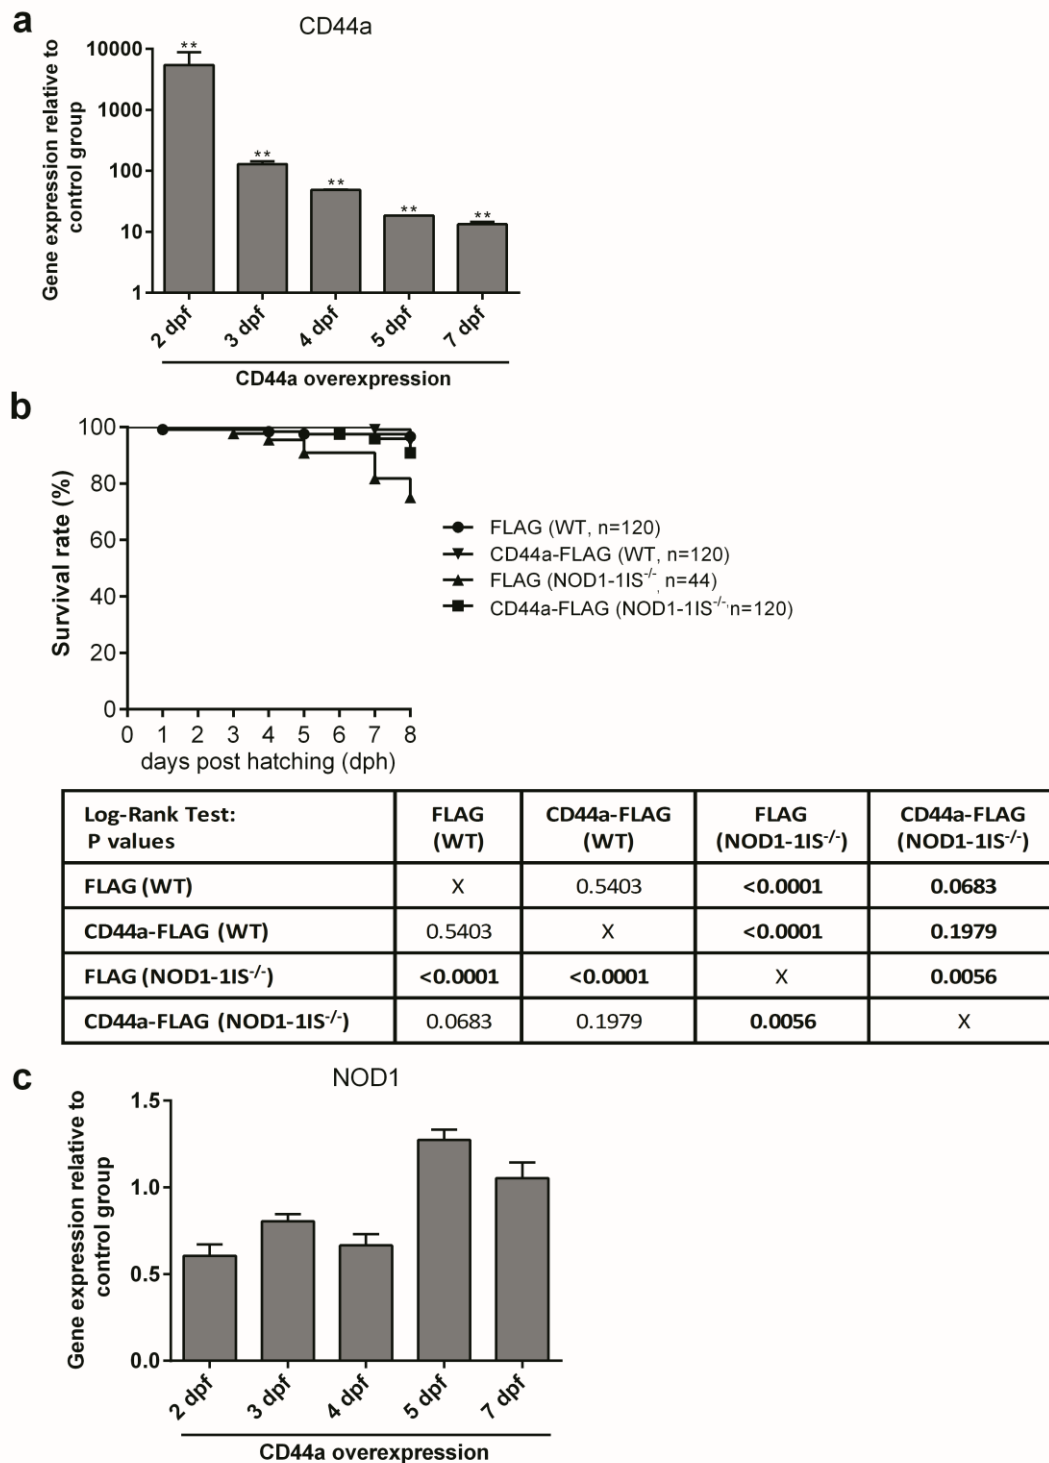

**Fig. S4. CD44a overexpression in *NOD1-1IS<sup>-/-</sup>* zebrafish rescues larval survival.** (a) The expression of CD44a in WT zebrafish microinjected with p3×FLAG or CD44a-FLAG using qRT-PCR (mean ±SEM, n=3). Samples were collected at 2, 3, 4, 5 and 7dpf, and used for RNA extraction. Data were tested for statistical significance using two-tailed Student's t-test. \*\**p* < 0.01. (b) Survival of WT and *NOD1-1IS<sup>-/-</sup>* zebrafish microinjected with p3×FLAG or CD44a-FLAG (n=44~120 larvae each group). The survival curves lasting for 8 dph were compared statistically significant difference using the Log-Rank Test. (c) The expression of NOD1 in WT zebrafish microinjected with p3×FLAG or CD44a-FLAG using qRT-PCR (mean ±SEM, n=3). Samples were collected at 2, 3, 4, 5 and 7dpf, and used for RNA extraction. Data were tested for statistical significance using two-tailed Student's t-test.

**Table S1. Enrichment analysis of the KEGG pathways for differentially expressed genes in WT vs *NOD1-IIS*<sup>-/-</sup> zebrafish larvae**

| #Term                                        | Id      | Sample number | Background number | P-Value     | typeII                                    |
|----------------------------------------------|---------|---------------|-------------------|-------------|-------------------------------------------|
| Selenocompound metabolism                    | ko00450 | 4             | 22                | 0.000649471 | Metabolism of other amino acids           |
| Antigen processing and presentation          | ko04612 | 10            | 97                | 0.001201018 | Immune system                             |
| Drug metabolism - cytochrome P450            | ko00982 | 4             | 47                | 0.008010135 | Xenobiotics biodegradation and metabolism |
| Steroid hormone biosynthesis                 | ko00140 | 4             | 47                | 0.008010135 | Lipid metabolism                          |
| Metabolism of xenobiotics by cytochrome P450 | ko00980 | 4             | 51                | 0.010417054 | Xenobiotics biodegradation and metabolism |
| Primary bile acid biosynthesis               | ko00120 | 3             | 29                | 0.013136656 | Lipid metabolism                          |
| Retinol metabolism                           | ko00830 | 4             | 55                | 0.013247944 | Metabolism of cofactors and vitamins      |
| NOD-like receptor signaling pathway          | ko04621 | 4             | 73                | 0.031766049 | Immune system                             |
| Carbon fixation pathways in prokaryotes      | ko00720 | 2             | 21                | 0.04889759  | Energy metabolism                         |

**Table S2. Primer information**

| Name                 | Sequence                            | Application                       |
|----------------------|-------------------------------------|-----------------------------------|
| CD44a-FLAGF          | GTCAAGCTTACCATGTGGACTTTGTTATTGTAG   | Ligated to p3xFLAG-CMV™-14 vector |
| CD44a-FLAGR          | GAAGGTACCATTAATATTCITTTTCGTGTTTCATC |                                   |
| NOD1-FLAGF           | GTGGAATTCTGAAATGAAATTAATATGG        |                                   |
| NOD1-FLAGR           | GAAGGATCCGCTGACTCCCTCTCGTTG         |                                   |
| NOD2-FLAGF           | CCGGAATTCAACTATGAACGCTCAACAGT       |                                   |
| NOD2-FLAGR           | CGCGGATCCGAAAGTCAATCTGCATTC         |                                   |
| NOD1F                | AGCAACTGCGACCTCTTTCA                | Quantitative real-time PCR        |
| NOD1R                | TGGCGAGATATTTCCCACCTACA             |                                   |
| CD44aF               | GAAAGTAATGCGAAGGAG                  |                                   |
| CD44aR               | TCATCAGTGCCACAATCT                  |                                   |
| lckF                 | TACGTAAACATGGGGAAGT                 |                                   |
| lckR                 | TCTTCTCCCCTTCTCAAAC                 |                                   |
| NALPL1F:             | TCGTTCTCCACGGTGACTC                 |                                   |
| NALPL1R              | AGCAGGGCACAAACAATGAC                |                                   |
| mhc1umaF             | ACGGTGCAAAGGACATACAACAAC            |                                   |
| mhc1uma R            | ATCAGCCAGTAAATACATCCAAGT            |                                   |
| mhc1ulaF             | AAGAGTCACATGGGTTG                   |                                   |
| mhc1ulaR             | CTCATTGGCTTTAGTTC                   |                                   |
| similar to mhc1uba-F | GGATGGAAGATAAACTTGGGACA             |                                   |
| similar to mhc1uba-R | CAGCCACTCAATGCACTCAGACC             |                                   |
| mhc1ubaF             | AAAACGCTCACCTGGACTG                 |                                   |
| mhc1ubaR             | ATACTTCTGCACCCACTCA                 |                                   |
| MHC-IIβF             | TGAGGAGATGGCTGATGGAGAC              |                                   |
| MHC-IIβR             | CATAGATGATGGGCTTAGTTGA              |                                   |
| mhc2dabF             | CTCTGTGGGGAAGTTTGTG                 |                                   |
| mhc2dabR             | CCAGATCCGAGCATTATGTC                |                                   |
| gene26712F           | GTGGCATTGATGTGGCAGAAGC              |                                   |
| gene26712R           | CGACTGACAAACCCAGAAGAAA              |                                   |
| gene38616F           | AAAACACTTTCGCTCTTCCCTAA             |                                   |
| gene38616R           | TACAGACTCCTGGATTTCTTGAT             |                                   |
| gene26713F           | AGGTTGTGCCGCTTTGACTT                |                                   |
| gene26713R           | CATTCCTTTAGATTGTGGGT                |                                   |
| gene2604F            | TTTCTTGAGCGGGAATACAGT               |                                   |
| gene2604R            | ATGAGGGATGGAAGTTGGAC                |                                   |
| gene39147F           | GCTCTATTGGCACGATGTIA                |                                   |
| gene39147R           | CAGACGATTGTTGCGTAGGT                |                                   |
| gene4944F            | GCATTCAGTGATGGGTCT                  |                                   |
| gene4944R            | ATCCAGGTGTCCAGTTTT                  |                                   |
| gene12406F           | CCTGACACAAGTCGACAAAAGAGAA           |                                   |
| gene12406R           | ATCCAGATGAGGGAAGAACGAAGC            |                                   |
| gene12839F           | ACCTCTTTCTGCGTTTCTGCTT              |                                   |
| gene12839R           | GCTTCTCCTCCGAGTGTGTTGCT             |                                   |
| gene4933F            | GAGGACAAAAACAACATCAGTC              |                                   |
| gene4933R            | CTCACAGCGGGCACCAGTCT                |                                   |
| gene8198F            | TCTTTAGAAGTGGAGGAC                  |                                   |
| gene8198R            | ATGTGGCTGATGATGTTT                  |                                   |
| gene39994F           | TGACTTTGTGGAGGAACT                  |                                   |
| gene39994R           | GCTGAGCGGTGACATTAC                  |                                   |

|            |                           |
|------------|---------------------------|
| gene3642F  | GATTCCTGATGTCTGGGTC       |
| gene3642R  | AGGGTGTAAACATTTCCGGT      |
| gene12370F | TCCTGGGCTTTAATCTGCTACG    |
| gene12370R | GCGGCTCAGTGAATGTGGTTTG    |
| gene1131F  | CCACGGACCTCCACAGAACTAT    |
| gene1131R  | CAGCGACTCCCTTCGTGAGCACA   |
| gene1132F  | AAATCCATCAACCTGTTCCACT    |
| gene1132R  | ACAAAGACCACCGCTGACCACT    |
| gene1133F  | AGATGAAAACCTGCCCAA        |
| gene1133R  | GCTAGAGCCGTGACAAGTG       |
| gene12961F | TGCTAGAGTTTCTGCTGGAC      |
| gene12961R | AAAGTTTATGGTGGACGC        |
| gene26693F | CAATGAGAAGTTTGCGGAGTT     |
| gene26693R | ATGACAGCAGATGCGGTTATG     |
| gene33648F | GACCAATCTCATCAGAGGGAA     |
| gene33648R | CGGCGAGTAGCACATAATAAA     |
| gene26589F | AAGTTGGTGGGTTGTGGT        |
| gene26589R | CTCGCAGATTTGAGAAGT        |
| gene6751F  | GAGAATACACAGAAGCAAGGTGCAG |
| gene6751R  | GAACGGCAGTGGAAATATGAAGAC  |
| gene23645F | AGAAGCTCGTGCCCGTAGT       |
| gene23645R | ATGCCAAATCAGCAGAACC       |
| nfkb1F     | TGTGGTTCGGCTGATGTTC       |
| nfkb1R     | GGTTCGCTCGTCTCGTTGT       |
| nfkb2F     | AAGATGAGAACGGAGACACGC     |
| nfkb2R     | TCTACCAGCAATCGCAAACAA     |
| nfkb1aF    | CATTCACGAGGCAGAGGATTAT    |
| nfkb1aR    | TCCGCTGTAGTTAGGGAAGGTA    |
| nfkb1bF    | TGTCATTGTTGAAAGCCTCAT     |
| nfkb1bR    | TAATCCTCGTCGCTATCCTCAC    |
| MAPK1F     | ATTACCTGCTGTCCCTTCC       |
| MAPK1R     | CTTCCTCCACCTCAATCCTC      |
| MAPK3F     | GACCTGAAGCCCTCAAACC       |
| MAPK3R     | GCATCCCACAGACCAAATA       |
| MAPK7F     | CCTCAGGGAAAAGTCACAAATG    |
| MAPK7R     | TCAGGTATCAGGAAGCGTAG      |
| MAPK8F     | TGACCCGTTACTACAGAGCC      |
| MAPK8R     | CATCCACCGAGATTCGTTTT      |
| MAPK10F    | GGGGCTCAGGGAATAGTGT       |
| MAPK10R    | AATCTCAGCGTGCAGTCG        |
| MAPK14F    | CGTGACGGTGGACATTTGGT      |
| MAPK14R    | TGGGCATCTGAGGAAGTGAG      |
| GAPDHF     | GTAACTCCGCAGAAAAGCCAGAC   |
| GAPDHR     | CAAAAGAACTAACACACACACA    |
